# Supplementary material
Source: publisher figshare collection journal article supplement (https://rs.figshare.com/ndownloader/files/17811161)
Supplement: Supplementary file [file 17811161]

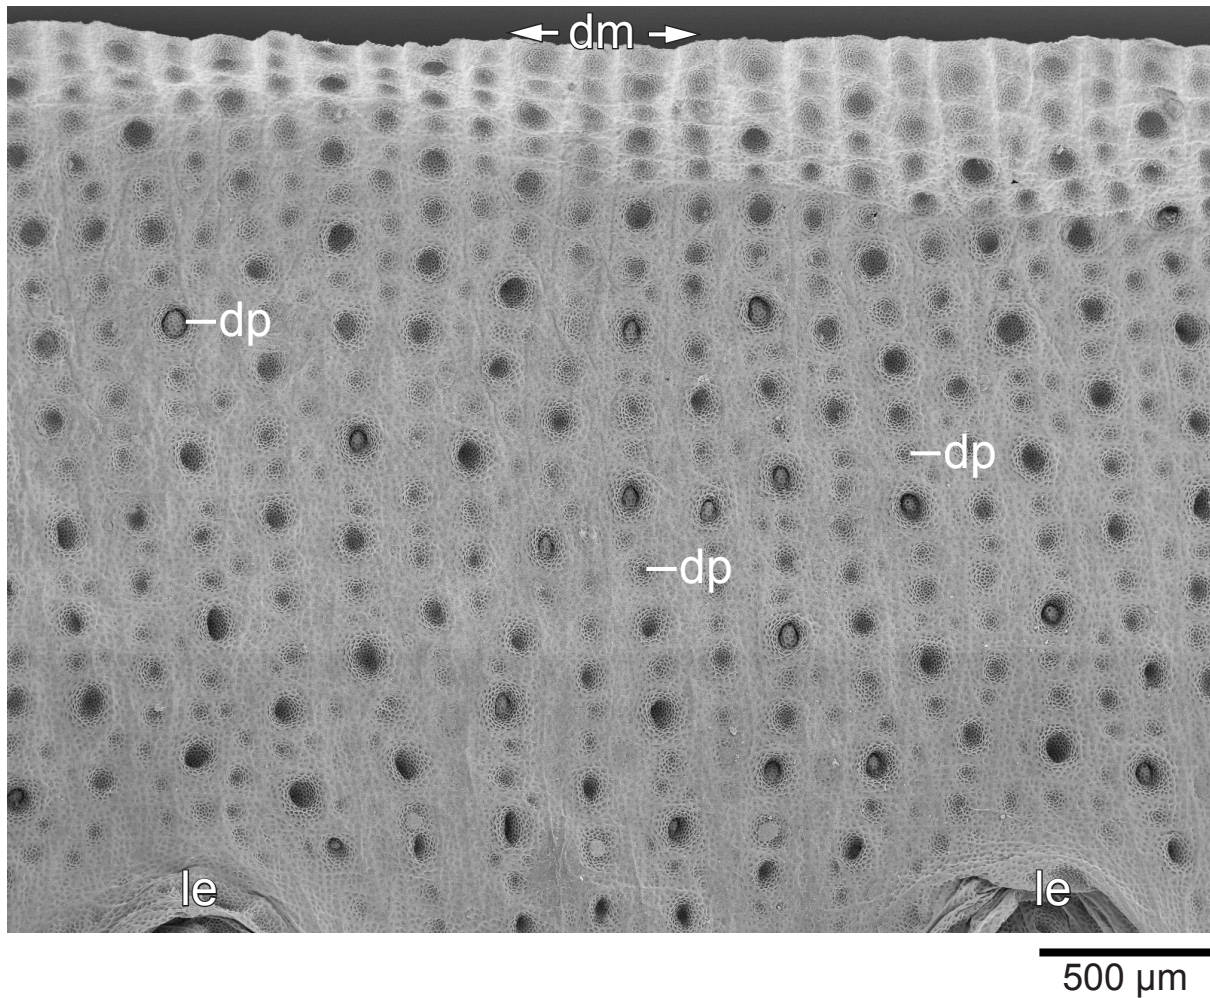

**Supplementary Figure 4. Internal view of a moulted skin of *E. rowelli*.** Scanning electron micrograph. Dorsal is up. Note the lack of apodeme-like structures on the dorsolateral body wall. Abbreviations: dm, dorsomedian furrow; dp, dermal papilla; le, leg.
